# Supplementary material for: A chip-based array for high-resolution fluorescence characterization of free-standing horizontal lipid membranes under voltage clamp
Source: Royal Society of Chemistry journal article supplement (doi:10.1039/d2lc00357k), 2022-01-01
Supplement: d2lc00357k1.pdf [file d2lc00357k1.pdf]

# 1 **A chip-based array for high-resolution fluorescence characterization** 2 **of free-standing horizontal lipid membranes under voltage clamp**

3 Tobias Ensslen and Jan C. Behrends

4 Laboratory for Membrane Physiology and Technology, Department of Physiology, Faculty of Medicine,  
5 University of Freiburg, Hermann-Herder-Str. 7, 79104 Freiburg, Germany

6

## 7 **Abstract**

8 Optical techniques, such as fluorescence microscopy, are of great value in characterizing the structural  
9 dynamics of membranes and membrane proteins. A particular challenge is to combine high-resolution  
10 optical measurements with high-resolution voltage clamp electrical recordings providing direct  
11 information on e.g. single ion channel gating and/or membrane capacitance. Here, we report on a  
12 novel chip-based array device which facilitates optical access with water or oil-immersion objectives  
13 of high numerical aperture to horizontal free-standing lipid membranes while controlling membrane  
14 voltage and recording currents using individual micropatterned Ag/AgCl-electrodes. Wide-field and  
15 confocal imaging, as well as time-resolved single photon counting on free-standing membranes  
16 spanning sub-nanoliter cavities are demonstrated while electrical signals, including single channel  
17 activity, are simultaneously acquired. This optically addressable microelectrode cavity array will allow  
18 combined electrical-optical studies of membranes and membrane proteins to be performed as a  
19 routine experiment.

20

## 21 **1 Introduction**

22 Many membrane processes, including the gating of ion channels, formation of protein pores and  
23 membrane fusion give rise to electrical signals such as current flow or membrane potential changes as  
24 well as capacitance changes. These signals can be detected with sub-millisecond time resolution and  
25 are often directly related to structural changes on the single molecule level. On the other hand, after  
26 labelling of either membrane lipids or protein residues with fluorophores, these molecular structural  
27 rearrangements can also be followed optically, e.g. using steeply distance-dependent dipole coupling  
28 phenomena such as Förster resonance energy transfer (FRET).<sup>1</sup> There is general consensus that  
29 combining electrical and optical readouts of membrane-delimited single-molecule dynamics would be  
30 of great value and a number of attempts have been made in this direction which are well summarized  
31 in a recent review.<sup>2</sup> In fact, the combination of single ion channel recording and single molecule

32 fluorescence spectroscopy has been suggested almost 30 years ago.<sup>3</sup> While patch-clamp fluorometry  
33 has already allowed a correlation of protein structural dynamics and functional activity on the  
34 ensemble level<sup>4</sup> and voltage clamping of excised cellular membrane patches routinely yields functional  
35 single-molecule resolution for ion channel gating, regularly achieving a recording configuration  
36 simultaneously enabling the high optical resolution and sensitivity required for, e.g., single molecule  
37 FRET experiments, has proven difficult. Likely for this reason, correlation in membranes between  
38 electrical signals reporting on single channel function and optical signals related to structural dynamics  
39 has only been shown for a model peptide channel, gramicidin,<sup>5,6</sup> but not for protein ion channels.

40 The particular difficulty of experiments combining voltage clamping and optics for single molecule  
41 experiments lies in the fact that conditions over which the experimenter has relatively little or almost  
42 no control are seldom right for both measurements. For instance, a healthy membrane with high  
43 resistance suitable for high-resolution voltage clamping with the right number (often only one) of  
44 electrically detectable channels or pores inserted may at long last have been obtained, but the  
45 fluorophore on that pore or channel may already have been bleached, or may bleach immediately  
46 after recording has really commenced. Conversely, the number of healthy fluorophores may be just  
47 right but the membrane has become unstable, leaky or noisy, possibly from photo-oxidation, so as to  
48 prevent an actual measurement<sup>2</sup>. Put generally, the product of probabilities that each one of the  
49 recording modes yields useful data, which themselves are products of non-unity probabilities,  
50 becomes very small and the number of trials to successfully complete a project becomes inordinately  
51 large. In order, therefore, to become more routine, such experiments need to be carried out in an  
52 easily usable, parallel (array) format in order to push the success probability into a tolerable range.

53 A very important requirement for such array formats is, however, that they do not compromise on the  
54 resolution of the original methods. As has been pointed out,<sup>2</sup> a further major difficulty in  
55 simultaneously applying two highly sensitive and physically distinct measurements to membranes lies  
56 in the fact that the requirements for one and the other are not necessarily compatible, especially in  
57 miniaturized and parallel formats. Efficient collection of photons with high numerical apertures  
58 requires short working distances on the order of 100  $\mu\text{m}$ . In previous instances –quoted in Ref. 2– such  
59 an arrangement has been realized using horizontal layered designs where a coverslip glass forms the  
60 bottom of a chamber partitioned by a thin insulating septum into which an aperture is machined using,  
61 for instance, a combination of microneedle punching and high-voltage spark, as in a single-membrane  
62 device<sup>7,8</sup> that is also commercially available (Ionovation GmbH, Bissendorf, Germany). In these  
63 designs, electrical contact to the lower (*trans*) compartment is made through fluidic channels that lead  
64 to chambers into which macroscopic Ag/AgCl-electrodes are placed. If multiple apertures are to be  
65 individually contacted in this way, such assemblies rapidly become complex and cluttered with tubing

66 and wiring. In addition, the fluidic channels contribute large surface areas in contact with the active  
67 amplifier circuit and, therefore, considerable stray capacitance that by itself sets an upper limit to the  
68 usable bandwidth for electrical recording independent of membrane diameter.<sup>9-11</sup>

69 As an alternative to such designs, the droplet-on-hydrogel configuration<sup>12</sup> has been utilized in array  
70 formats to perform simultaneous optical and electrical recordings. The prime advantage, here, is that  
71 total internal reflection microscopy can be used on these membranes in a straightforward way.  
72 However, there are some disadvantages. In order to perform electrical recordings, each droplet has to  
73 be manually contacted with an Ag/AgCl electrode. The area of the bilayer is not well controlled and  
74 relatively large (>100  $\mu\text{m}$ ), again decreasing the usable bandwidth for electrical recordings due to stray  
75 capacitance. Not least, formation of the bilayers is a rather intricate process requiring formation of  
76 droplets in and harvesting from a separate chamber and involving considerable waiting time.<sup>12</sup>

77 Here we show that the architecture of the microelectrode-cavity array (MECA)<sup>13,14</sup> now in routine use  
78 for electrical recordings from channels and biological nanopores reconstituted in bilayers<sup>15,16</sup> can be  
79 adapted to provide optical access for high-resolution fluorescence microscopy while maintaining the  
80 prerequisites for electrical recording with single-channel resolution. Notably, in contrast to the  
81 previous designs mentioned above, the optically addressable MECA (MECA-opto), like the original  
82 MECA, is produced using standard MEMS and microplating/electrochemistry processes, and provides  
83 independent electrical access to multiple membranes by means of planar microelectrodes without  
84 requiring microfluidic channels. The novel device thus provides multiple (currently 4) identical  
85 apertures on which membranes can be rapidly and repeatedly formed by classical painting procedures  
86 and recorded from electrically and optically with high resolution, thus combining all the advantages of  
87 the original MECA device with the high-resolution optical recording. While one membrane at a time is  
88 selected for optical readout using high-resolution optical equipment, membrane conductance and  
89 capacitance can be monitored in parallel using a compact 4-channel amplifier, allowing the user to  
90 rapidly switch between recording sites in the event of e.g. membrane rupture, photobleaching or  
91 other adverse events, and thereby increase the chances of successful optical-electrical experiments.

92

## 93 **2 Materials and Methods**

### 94 **Device Design and Fabrication**

95 The design of the MECA-opto is based on a modification of the original MECA design.<sup>13</sup> The  
96 modification consists in 1) forming the floor of the cavity by a  $\leq 170\mu\text{m}$  thick coverslip glass instead  
97 of the 500  $\mu\text{m}$  thick glass plate used for the MECA and 2) modifying the first photolithographic mask  
98 so that the initial 200 nm-thick gold patterns (electron beam deposition on 20 nm titanium adhesion

99 layer) inside the cavities have the shape of a ring rather than of a disk and therefore leave a central  
100 optical window. As before, a second photolithographic step is then used to form the cavities in SU-8  
101 2010 (Microchem, Newton, MA) photoresist. For reasons of practicality, production of the devices  
102 was outsourced to Ionera Technologies GmbH, Freiburg, Germany. The lithographical steps  
103 described above were completed on 4-inch glass wafers from which 1.2 x 1.2 cm pieces were cut,  
104 each containing one 2 x 2 MECA pattern. The individualized glass chips were then individually placed  
105 into and contacted to FR-4 printed circuit boards (PCB) as shown in Fig. 1 using proprietary assembly  
106 and packaging technology (Ionera GmbH, Freiburg, Germany) for subsequent electroplating as  
107 described before<sup>13</sup> and for use with the OrbitMini device (Nanon Technologies GmbH, Munich,  
108 Germany).

109

### 110 **Electrophysiology and Membrane Formation**

111 Voltage-clamp recordings were performed using a modified version of the OrbitMini device (Nanon  
112 Technologies, Munich, Germany) equipped with the MECA-opto microelectrode cavity array described  
113 under Device Design and Fabrication above. General experimental procedures can be found  
114 elsewhere.<sup>15,16</sup> The 4-channel patch clamp amplifier integrated in the OrbitMini was operated using  
115 the Elements Data Reader 3 software (Elements SRL, Cesena, Italy) at 2 nA range with 0-10 kHz  
116 bandwidth and 20 kHz digitization rate. Recordings were performed at room temperature (23-25 °C)  
117 in 1 or 4 M KCl (pH 7.5, 25 mM TRIS-HCl) or in PBS-buffer as indicated.

### 118 **Channel-forming peptides and fluorophores**

119 Native ceratotoxin A (CtxA) was a kind gift from Michael Meyer (Adolph Merkle Institute, Fribourg,  
120 Switzerland). Fluorescently labeled CtxA-derivatives were custom synthesized and purified by HPLC  
121 (Biosynthan GmbH, Berlin, Germany). Lipid bilayers were formed from di-phytanoyl-  
122 phosphatidylcholine (DPhPC) dissolved at 5 mg/ml in octane. Lipid membranes were fluorescently  
123 labelled with lissamine-rhodamine-phosphoethanolamine (Liss-Rhod-PE) at <1 % (V/V). Lipids were  
124 purchased from Avanti Polar Lipids, Inc (Alabaster, AL, USA), dried as a film and stored at -20 °C under  
125 argon atmosphere prior to use.

### 126 **Fluorescence microscopy**

127 Epifluorescence wide-field microscopy was performed on an Axiovert200 microscope (Carl Zeiss AG,  
128 Jena, Germany) equipped with an Olympus (Tokyo, Japan) PLAPON60XOSC2 60X /NA (numerical  
129 aperture) = 1.4 oil immersion objective, a HBO100 mercury illuminator (Carl Zeiss AG, Jena, Germany)  
130 and a Prime 95B S-CMOS camera (Teledyne Photometrics, Tucson, AZ, USA). Confocal single-photon

131 fluorescence lifetime measurements were performed on a Microtime200 platform (PicoQuant GmbH,  
132 Berlin, Germany) using picosecond pulsed excitation at 531 +/- 3 nm, an Olympus UPLSAPO 60X/  
133 NA=1.2 Ultra-Planachromat water immersion objective, a 50 µm pinhole and single photon detection  
134 with Excelitas (Waltham, MA, USA) Avalanche Photodiodes.

### 135 **Data analysis and graphing**

136 Wide-field images and stacks were processed in ImageJ (Wayne Rasband, National Institutes of Health,  
137 Bethesda, USA). Confocal life-time and photon-counting data were processed in SymPhoTime 64  
138 (Picoquant). Current and voltage traces were exported as axon binary files and imported into IgorPro8  
139 (Wavemetrics, Portland, OR, USA) using Neuromatic XOP (Rothman and Silver 2018). Figures were  
140 assembled in PowerPoint (Microsoft, Seattle, USA).

141

## 142 **3 Results and Discussion**

143 Here, based on the microelectrode cavity array (MECA) described earlier<sup>13,14</sup> and currently used as a  
144 consumable in several commercially available devices for multichannel lipid bilayer  
145 electrophysiology<sup>15,16</sup>, we introduce an novel array format that is amenable to high-resolution optical  
146 and electrical recording. The original MECA principle is based on blind cavities with diameters between  
147 200 and 10 µm in a photolithographically structured 20 µm thick dielectric photoresist (SU8) layer on  
148 a 500 µm-thick glass substrate<sup>13,14</sup> or printed circuit board (PCB).<sup>15</sup> In the original design, the floor of  
149 each cavity consists of a micro-patterned disk-shaped Ag/AgCl microelectrode that functions as the  
150 active *trans*-side electrode in a voltage-clamp circuit, while a single counter electrode is connected to  
151 a common bath on the *cis*-side of the membrane. This configuration with disk-shaped electrodes is  
152 amenable to upright microscopy with a water-immersion objective with millimeter working distance  
153 and correspondingly low numerical aperture. For high-resolution optical recordings a different  
154 approach is required. Here, we present a first solution based on ring-shaped microelectrodes, that  
155 define an optical window through glass substrates of coverslip (i.e. 170 µm) thickness through which  
156 the bilayer can be imaged using high NA immersion objectives (**Figure 1**). It should be stressed that the  
157 focus of the optical recording, here, is on spatially resolved fluorescence measurement from the  
158 membrane, and not on transport of labeled substrates into one of the electrolyte compartments as in  
159 a recent approach also involving micropatterned Ag/AgCl-electrodes and droplet bilayers.<sup>17</sup> As shown  
160 before, bilayers can easily and reproducibly be formed over the cavities using manual and automated  
161 variants of the classical Müller-Rudin painting method.<sup>14,18</sup> Importantly and as expected, the  
162 modifications with respect to the original MECA device preserve the ease of use of a compact chip-

163 based format, not requiring fluidic or electrical contacts by tubing or wiring and allowing the operator  
 164 to form suspended lipid bilayers in seconds (see Fig. S11) with success rates approaching 100%.<sup>14</sup>

165

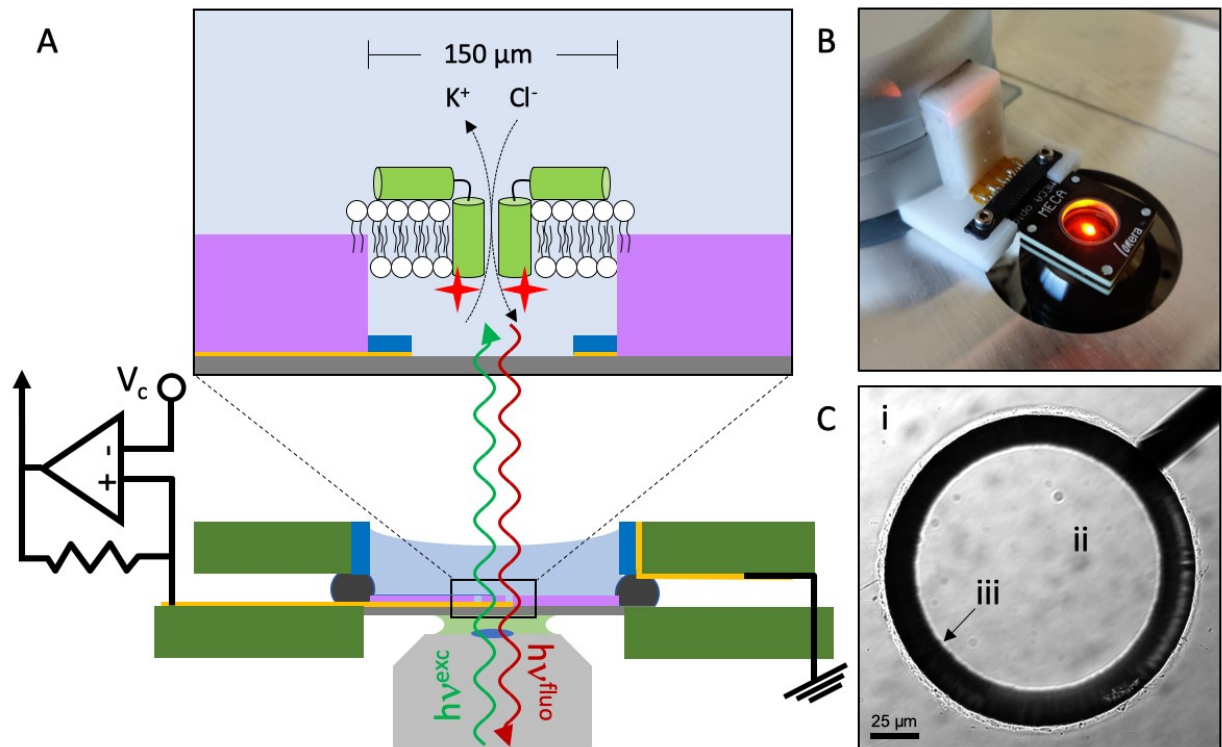

166  
 167

168 **Figure 1, A:** Schematic (not to scale) of the MECA-opto-device. Excitation and fluorescence light paths in and out of the oil or  
 169 water (light green) immersion objective (grey) are indicated by green and red waves ( $h\nu^{exc}$ ,  $h\nu^{flu}$ ). Inset: schematic blow-up  
 170 (not to scale) of one of four MECA-opto cavities. The planar Ag/AgCl microelectrodes (dark blue) and cavities in a 20  $\mu\text{m}$ -thick  
 171 photoresist (SU8, purple) are structured by lithography, Ag-deposition on Au strip-lines and chloridization as shown previously  
 172 (Baaken et al. 2008). To allow high-NA optical microscopy, the glass thickness is reduced to  $\leq 200 \mu\text{m}$  and the electrodes are  
 173 ring rather than disk-shaped. The devices use in this proof-of-principle demonstration had cavities with diameters of 150  $\mu\text{m}$ .  
 174 The 12 by 12 mm glass chip is glued into an opening in a fibre-glass/epoxy (FR-4 printed circuit (PCB) material) board on  
 175 which 5 planar connecting pins are realized. Four of the pins are connected to the gold strip lines leading to the  
 176 microelectrodes. A rubber O-ring and a circular (10 mm diam.) opening in a second PCB-board define an upper (cis-side)  
 177 chamber. The inner PCB chamber wall is lined with an Ag/AgCl coating serving as the common ground or bath electrode  
 178 (dark blue). During assembly, this electrode is connected to the fifth connector pin on the lower PCB-board. **B:** Photograph of  
 179 the MECA-opto chip mounted into the adaptor mediating connection to a Nanion Orbit-mini recording device placed on the  
 180 stage of the inverted microscope. The adaptor is constructed so that the lower surface of the MECA-opto-chip is flush with  
 181 the microscope stage. **C:** Differential interference contrast (DIC) image taken with an upright microscope of a single MECA-  
 182 opto cavity with SU8 surface (i), glass bottom (ii) and Au/Ag/AgCl ring electrode at the bottom of the cavity (iii). Note that the  
 183 SU8 surface was put into focus, thus the electrode 20  $\mu\text{m}$  below appears out of focus.

184 Lipid bilayers can be formed on these apertures by manual “painting” from lipid-in solvent suspensions  
 185 (Müller-Rudin method) either using a teflon spatula or an air bubble at the tip of a plastic micropipette.

186 <sup>15,16</sup>. As shown in Fig. 2 as well as in Fig. SI 1, successful *in situ* bilayer formation by the air bubble  
187 method, which is typically complete in approximately 10 s, can be readily ascertained by recording the  
188 current response to a sawtooth voltage command resulting in rectangular capacitive current  
189 responses from which the size of the thinned-out region of bilayers can be estimated. In the example  
190 shown in Fig. 2A, the bilayer was formed on an aperture with diameter 150  $\mu\text{m}$ . The capacitance  
191 measured (75 pF) would correspond to a circular bilayer with diameter of approximately 150  $\mu\text{m}$   
192 according to estimates of the specific capacitance of solvent-containing DPhPC-bilayers of  
193 approximately  $0.4 \mu\text{F}/\text{cm}^2$ ,<sup>19</sup> while DPhPC bilayers formed by the Müller-Montal technique<sup>20</sup> have  
194 specific capacitances of  $0.95 \mu\text{F}/\text{cm}^2$  due to lower solvent content<sup>21</sup>. Previous capacitance estimations  
195 for DPhPC bilayers on MECAs also indicated that the aperture area is almost entirely occupied by a  
196 bimolecular layer and that the area occupied by the solvent annulus is minimal.<sup>22</sup> The resulting bilayers  
197 are mechanically stable, allowing transport between different set-ups, and, in the pure state, last for  
198 many hours. Current noise at 0-10 kHz bandwidth was between 5 and 10 pA r.m.s. with the 150  $\mu\text{m}$   
199 diameter apertures used here.

200 Inset *i* in Fig. 2B shows a wide-field fluorescence micrograph from the same membrane that provided  
201 the electrical recording in Fig. 2A and that was labelled by admixing 0.5% lissamine-rhodamine  
202 phosphoethanolamine to the lipid suspension used for membrane formation. In order to reduce  
203 background, the field of illumination was limited to the center of the cavity using an iris. A sharp  
204 projection of the iris in the plane of the membrane was also helpful in setting the focus. The graph in  
205 Fig 2B shows the fluorescence intensity in that area plotted against time and frame number (frame  
206 rate 100 Hz). At frame 159 = 1.59 s the membrane was destroyed by electroporation with a pulse of  
207 high voltage (1 V), resulting in a 80% loss of fluorescence (see Fig. 2D). Interestingly, at the frame rate  
208 used, an intermediate stage can be observed (Fig. 2B inset ii, Fig. 2C) where fluorescent lipid can be  
209 seen to retract in radial fashion towards the rim of the aperture. Complete retraction of lipid took  
210 place within 5 frames (159-164) corresponding to the surprisingly long interval of 50 ms.

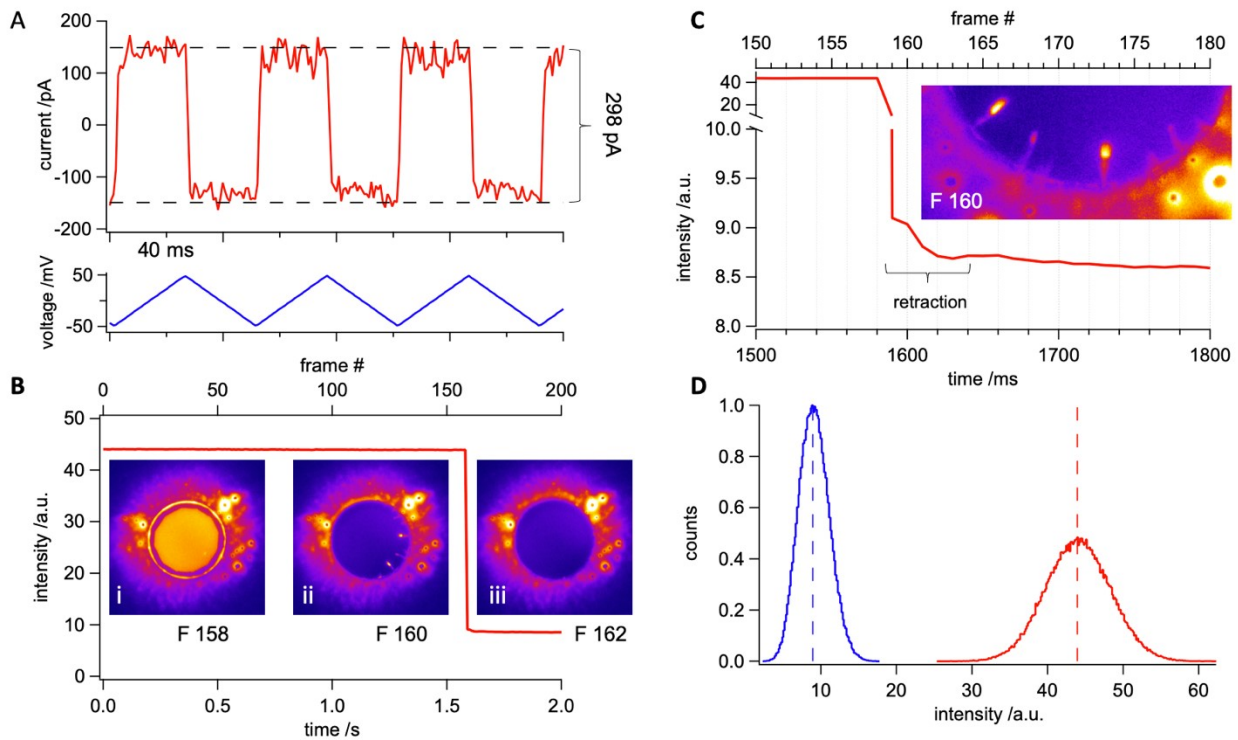

211

212 **Figure 2, A:** current vs. time-trace (red) for a DPhPC lipid membrane spiked with Liss-Rhod-PE under electrical stimulation  
 213 using a triangular voltage protocol of  $\pm 50$  mV with  $dV/dt=4$  V/s (blue) The corresponding 300 pA capacitive current indicates  
 214 a total membrane capacitance of 75 pF. For dynamics of bilayer formation see Fig. SI 1. **B:** fluorescence intensity versus time  
 215 trace. Sharp intensity decrease at 1.59 s is caused by irreversible electroporation of the bilayer using a voltage pulse of  
 216 +1000 mV for 200 ms. Insets: Heat-stained images extracted from a 2 s long sequence ( frame rate 1/10 ms) reveal a  
 217 homogeneously thinned and Liss-Rhod-PE spiked DPhPC bilayer (F158) bursting under the voltage. Excess lipid could be  
 218 observed to retract with finger-like structures towards the SU8 surface lining the aperture (F160) until a fully open orifice with  
 219 low background signal is detected (F162). **C:** sequence of the fluorescence-time trace immediately preceding and following  
 220 electroporation to illustrate lipid retraction over 50 ms ; inset: rotated blow-up of the rim from frame 160 in B. **D:** fluorescence  
 221 intensity histograms before (red) and after (blue) membrane electroporation. A clear shift towards lower greyscale values  
 222 indicate loss of the fluorescence signal.

223 The ability to simultaneously observe optical and electrical dynamics in free-standing membranes is  
 224 particularly attractive for studying molecular events leading to the opening of voltage-dependent ion  
 225 channels. In particular, correlating the movement of single voltage sensor domains detected optically  
 226 with open-closed transitions measured electrically would be a major step forward. Antibiotic  
 227 polypeptides such as mellitin<sup>23</sup> and alamethicin<sup>24-26</sup> form multimeric channels in a voltage-dependent  
 228 manner and can be regarded as models for voltage-dependent gating. Both fluorescently labelled  
 229 alamethicin<sup>27</sup> as well as mellitin<sup>28</sup> have been used in fluorometric measurements on free standing  
 230 lipid membranes; in the case of mellitin, channel activity was successfully correlated on the ensemble  
 231 level with optical detection of voltage-dependent peptide reorientation. For single channel studies,  
 232 mellitin is not ideally suited because the current steps are not as clearly delineated as those for  
 233 alamethicin. On the other hand, the chemical nature of alamethicin as a peptaibol-containing non-



234 amino-acid monomers complicates synthesis of fluorescent derivatives. Recently, however, a further  
235 voltage-dependent antibacterial peptide, Ceratotoxin-A (CtxA), –natively found in the mediterranean  
236 fruit fly *Ceratitis capitata*–was described that consists entirely of proteogenic amino acids but shows  
237 well-defined current levels like alamethicin.<sup>29-31</sup>

238 In order to ascertain the possibility of performing correlated single-channel and fluorescence  
239 recording, we prolonged the native 36 amino acid sequence of Ctx-A by a C-terminal cysteine, which  
240 was then fluorescently labeled with an Atto532-maleimide dye at its thiol (CtxA-C-Atto532M). Based  
241 on structural and functional similarities to alamethicin, CtxA is conceptualized as consisting of two  
242 helices, of which the C-terminal one, featuring mainly hydrophobic residues, might reorient into the  
243 membrane, while the N-terminal helix, possessing multiple charged lysine residues, remains on top of  
244 the membrane. According to the current model, which is analogous to the barrel-stave model for  
245 alamethicin channel formation, a minimum of three CtxA monomers, partly reoriented into the  
246 membrane, will then form a transient pore with a central channel, which can be discretely increased  
247 in its diameter due to random incorporation of further reoriented monomers.<sup>29-31</sup>

248 **Fig. 3A** shows a representative 3 s current-time trace recorded from a DPhPC-bilayer in the presence  
249 of 5 nM CtxA-C-Atto532M revealing burst-like current transients due to CtxA assembly and pore  
250 opening at a holding potential of +140 mV *trans*. At the end of the recording, the membrane was again  
251 irreversibly electroporated which resulted in a sharp current increase (see also **Fig. 3B**) as well as an  
252 abrupt decrease in the fluorescence signal (**Fig. 3C**). However, as is also evident from the fluorescence  
253 images before and after membrane disruption (**Fig. 3D**) the relative reduction in brightness was much  
254 less than that observed with fluorescent lipids. As also revealed by confocal microscopy (see  
255 description of Fig. 4), the autofluorescence of the borosilicate glass used here caused considerable  
256 background. This is also in line with the finding that certain discernable features in the CMOS-image  
257 such as brighter and darker spots and/or lines are unaltered after membrane rupture, while the  
258 peptide-stained membrane appears to merely add general brightness.

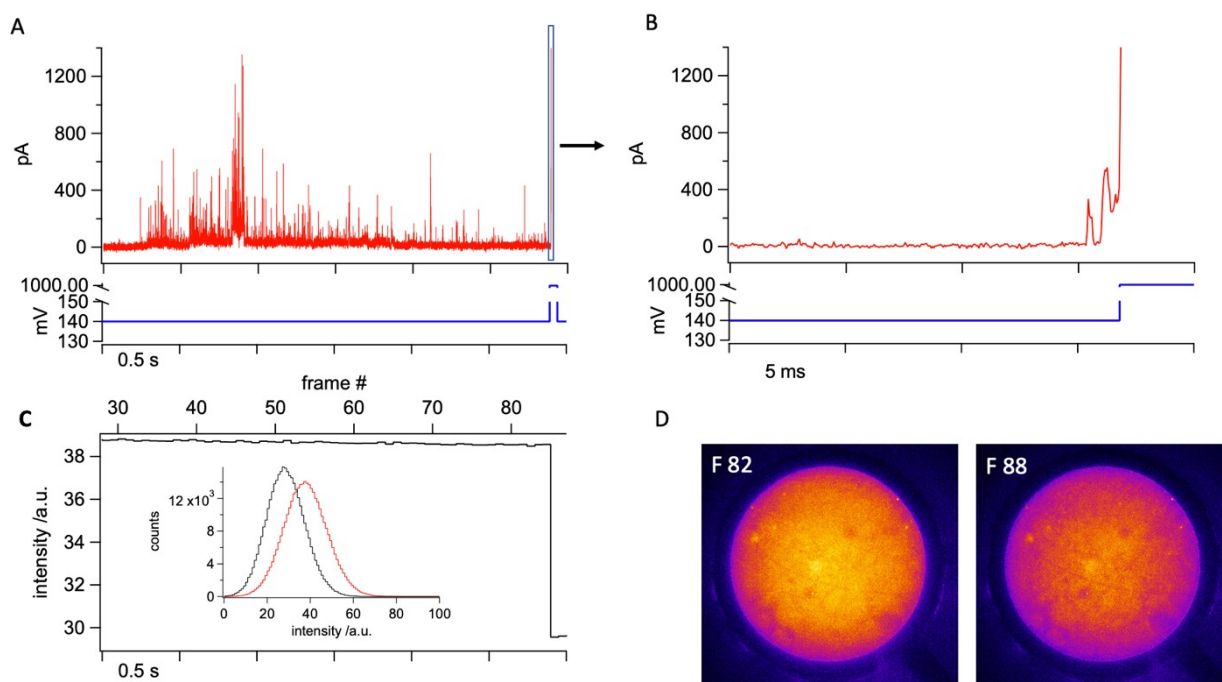

259

260 **Figure 3, A:** current-time trace (red) recorded from a DPhPC bilayer at a bandwidth of 10 kHz and 20 kHz sampling rate in 1 M  
 261 KCl incubated with 5 nM CtxA-C-Atto532M under a constant trans-positive voltage of +140 mV trans (blue). Transient current  
 262 events are caused by spontaneous pore formation of membrane associated CtxA peptides under the applied voltage. The  
 263 bilayer was sacrificed by the end of the experiment using a 200 ms long voltage pulse of 1000 mV; **B:** expanded current and  
 264 voltage traces during from the region indicated by the black box contour in panel A. Abrupt current increase indicates loss of  
 265 the bilayer. Prior current peaks are caused by CtxA pore formation; **C:** fluorescence over time trace extracted from a 6 s long  
 266 movie sequence during burst of the bilayer. The sudden drop of fluorescence intensity indicates the loss of the bilayer. Inset  
 267 shows histograms of fluorescence intensity in the membrane area before (red) and after (blue) membrane loss. **D:** Two images  
 268 from the sequence obtained before (82) and after (88) membrane destruction.

269 In order to further analyze the relative contribution of membrane-bound channel-forming peptide to  
 270 the fluorescence signal, we conducted a single-photon counting fluorescence life-time study on free  
 271 standing bilayers, comparing DPhPC membranes either spiked with Liss-Rhod-PE or doped with  
 272 CtxA-C-Atto532M. Fig. 4A shows a representative fluorescence lifetime image (FLIM) recorded in the  
 273 x-z plane from a free standing Liss-Rhod-PE spiked DPhPC membrane. The scan is situated at the border  
 274 of the cavity, and shows the SU8-layer to the right displaying, as expected, considerable fluorescence  
 275 with excitation at 530 nm<sup>32</sup> as does the glass bottom of the cavity. The membrane (M) can be seen to  
 276 separate the *trans*- from the *cis*-volume; its fluorescence is very weak above the electrode (E) due to  
 277 the shadow cast by the metal. Interestingly, the membrane appears curved outward. Some degree of  
 278 membrane curvature, either inward or outward (see Fig. 5 A) was observed repeatedly in these  
 279 experiments. Repeated formation of membranes on the same aperture could lead to inwardly and  
 280 outwardly curved as well as flat membranes, suggesting that the precise movement by which the  
 281 membrane is manually formed influences its geometry. Indeed, a similar observation was made in a  
 282 previous confocal study on freestanding lipid bilayer membranes.<sup>33</sup> Importantly, the *cis* and *trans*

283 volumes above and below the membranes were free of detectable fluorescence. It is also obvious that  
284 the membrane appears surprisingly thick with a full width at half maximal intensity of 3.7  $\mu\text{m}$   
285 compared to membranes from e.g. giant unilamellar vesicles.<sup>34</sup> This finding, which is in line with  
286 previous results<sup>33</sup> is probably partly due to the inherently inferior resolution in the z-axis compared to  
287 that of the x-y plane in confocal measurements, as well as to relatively coarse scanning step used (300  
288 nm). Labelled lipid is also clearly visible on top of the SU8 layer (compare Fig. 2B and Fig. 5 in Ref. which  
289 has the expected thickness of approximately 20  $\mu\text{m}$ . Labelled lipid is seen to be present on the SU8  
290 surface (compare Fig. 2B) as well as at the rim of the aperture, likely corresponding to the torus or  
291 annulus.<sup>35</sup> The borosilicate glass layer can be clearly seen to emit fluorescence with lifetimes  
292 considerably lower than that of the membrane.

293 Fig. 4B shows another cavity containing a pure DPhPC-bilayer after equilibration with 5 nM  
294 CtxA-C-Atto532M added to the *cis*-compartment. Fluorescence can clearly be detected in the  
295 membrane as well as above the SU8-layer indicating enrichment of fluorescent peptide at the  
296 lipid/water interface. The annulus is not visible, as expected when fluorescent material is present only  
297 at the *cis*-ward surface. Again, and in line with the wide-field epifluorescence results, there is  
298 considerable fluorescence of the glass bottom.

299 Single-photon counting lifetime measurements in the region of interest revealed a characteristic  
300 lifetime of approximately  $\tau=3$  ns for fluorescence emitted from Liss-Rhod-PE spiked DPhPC membranes  
301 (Fig. 4C), which is in good agreement with the literature value for the conjugated fluorophore.<sup>36</sup> The  
302 lifetime of the fluorescence observed in CtxA-C-Atto532M-doped membranes (Fig. 4D) was  $\tau=3.8$  ns  
303 in perfect agreement with the value given by the manufacturer for the free Atto532 dye.

304 Current measurement from the membrane shown in B at a holding potential of +120 mV *trans* revealed  
305 discrete current levels, characteristic for CtxA (Fig. 4E). Comparison with native CtxA recordings shown  
306 in Fig. 4F displays similar behavior and suggests the overall function of the labeled CtxA to be unaltered.  
307 Note that these recordings of native and labelled CtxA were performed at a bandwidth of 10 kHz so  
308 that we were not able to fully resolve sub-ms channel gating. This is due mainly to the fact that the  
309 first generation of MECA-opto devices used here has apertures of 150  $\mu\text{m}$  diameter, resulting in  
310 sizeable capacitance which limits the usable bandwidth due to noise.<sup>37</sup> In order to gain deeper insight  
311 into pore formation by CtxA-C-Atto532M vs. the native CtxA, we performed high resolution recording  
312 using the original MECA16 device, which allows recording at higher cut-off frequencies (50 kHz). These  
313 experiments, shown in Fig. SI 2, revealed that notwithstanding a general similarity as far as voltage-  
314 dependent increase in activity and supra-linearly increasing, discrete current levels are concerned,  
315 there are important differences in the characteristics of current steps induced by the native and the  
316 labelled variant. Notably, the current levels recorded in the presence of CtxA-C-Atto532M showed

317 high-frequency flickering, suggestive of rapid pore block by the highly mobile end group introduced at  
 318 the C-terminus (Fig. SI 3).

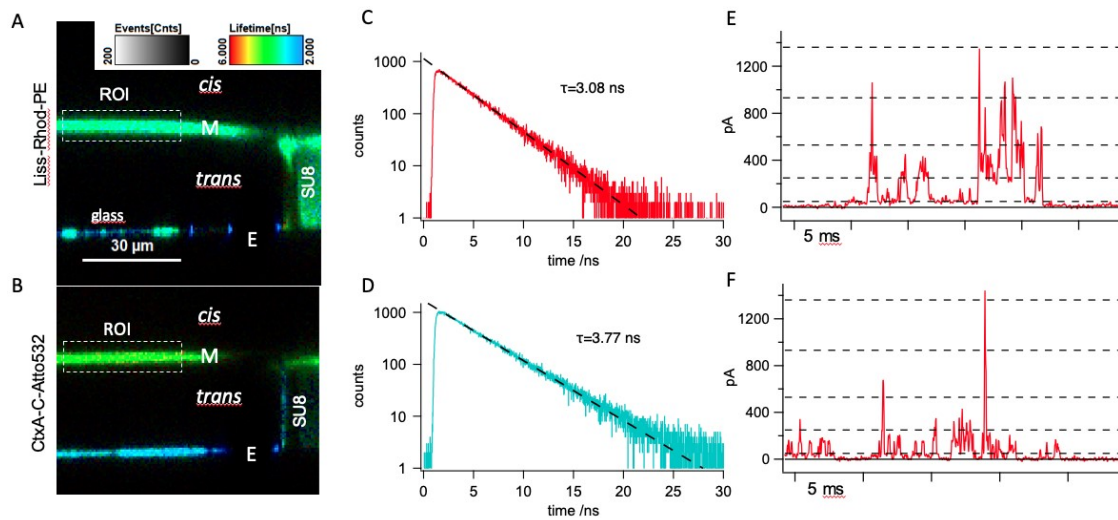

319

320 **Figure 4, A:** confocal x-z fluorescence-lifetime-scan of a freestanding DPhPC membrane spiked with 0.5% lissamine-  
 321 rhodamine-phosphatidylethanolamine (Liss-Rhod-PE) spanning a 150  $\mu\text{m}$  SU8 (turquoise, right side) aperture over a glass chip  
 322 (blue, bottom). The image was acquired in PBS buffer at pH 7.5; **B:** confocal x-z fluorescence-lifetime-image of a freestanding  
 323 unstained DPhPC membrane intoxicated with 5 nM CtxA-C-Atto532M (green). Notably, the electrode induced shading had a  
 324 major effect on the fluorescence at the SU8-lipid interface due to the fact, that the dye was distanced from the SU8 surface  
 325 by the lipid, thereby reducing unspecific reflections in this area. The clear signal of short lifetimes (blue) indicated the glass  
 326 substrate. The image was acquired in 1 M KCl at pH 7.5; **C:** fluorescence lifetime histogram obtained from the membrane  
 327 region of interest (ROI) shown in A in a single photon counting experiment. Exponential fitting revealed a lifetime of 3.08 ns.  
 328 **D:** fluorescence lifetime histogram obtained from the membrane region of interest (ROI) shown in B. Exponential fitting  
 329 revealed a lifetime of 3.77 ns. **E:** representative current-time trace recorded during simultaneous optical membrane  
 330 investigation in 1 M KCl at a constant trans-positive voltage of 120 mV showing transient pores are formed by fluorescently  
 331 labeled CtxA-C-Atto532M. Current recordings were carried out with the Orbit mini device at a final bandwidth of 10 kHz and  
 332 20 kHz sampling rate; **F:** exemplary current vs. time trace recorded with native CtxA on the MECA-opto device and under the  
 333 same conditions as in E. In E and F, current levels open states corresponding to trimer (O3) to heptamer (O8) (dashed lines)  
 334 were derived by linear correction for the experimental conditions used here of values reported in Ref. <sup>29</sup>.

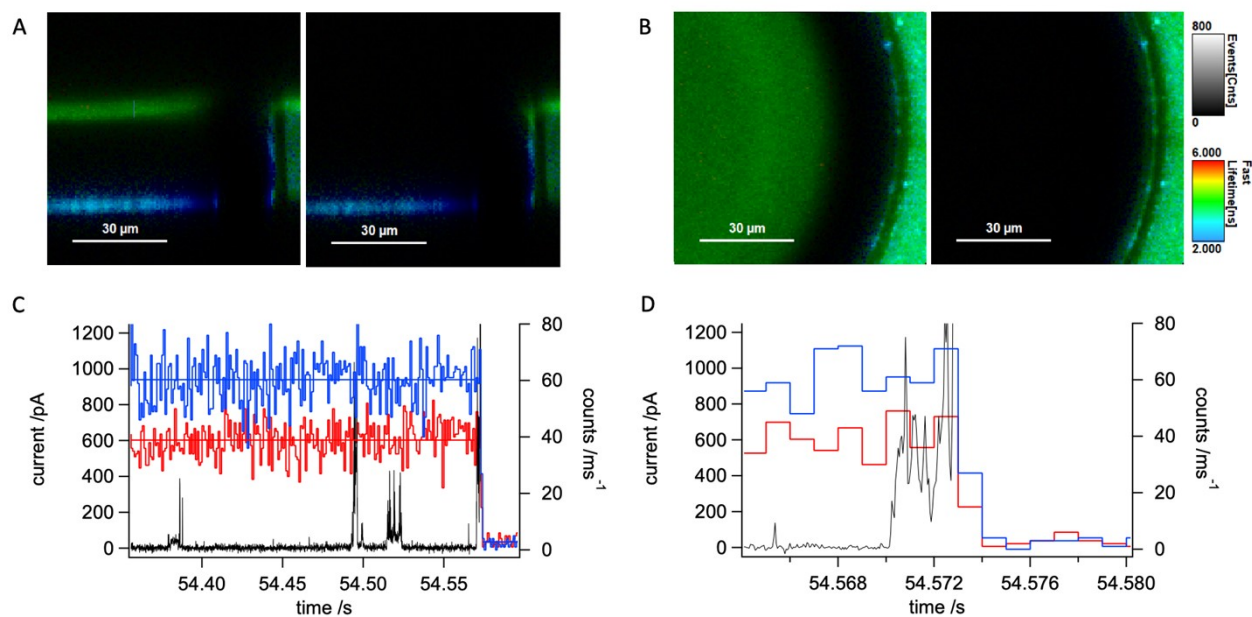

335

336 **Fig. 5, A,B:** confocal x-z (A) and x-y(B) fluorescence lifetime imaging scan of a microelectrode cavity with membrane (left  
 337 panels) and after spontaneous membrane rupture (right panels) in the presence of 5 nM CtxA-C-Atto532M in the cis-  
 338 compartment. C, D: photon count (blue: vertical polarization, red: horizontal polarization) and ion current-time traces  
 339 simultaneously recorded from the membrane shown in A,B.

340 We also noted a heightened tendency of the membrane to break spontaneously in the course of  
 341 CtxA-C-Atto532M-mediated channel activity suggesting that the end group may affect the interaction  
 342 of the peptide with the membrane upon channel formation.

343 Fig. 5 shows a further experiment using CtxA-C-Atto532M. The membrane, imaged in x-z and x-y in the  
 344 left panels of Fig. 5A and B, respectively, is seen to slightly curve into the cavity. Fig 5C and D show  
 345 traces of photon count (kHz) obtained with two avalanche photodetectors at vertical (blue) and  
 346 horizontal (red) polarization as well as the simultaneously acquired current signal at a constant voltage  
 347 of +120 mV cis. Note that we were unable to observe any changes in fluorescence intensity upon  
 348 changing the voltage between -120 and +120 mV. Before the membrane breaks the photon counts  
 349 remain stable at 60.31 kHz (vertical polarization) and 38.89 kHz (horizontal polarization). When the  
 350 membrane ruptures during the final burst of channel activity at 54.573 s (see also right panels in Fig.  
 351 5A,B) both photon counts are strongly reduced to values of 2.82 (vertical polarization) and 2.76  
 352 (horizontal polarization). With vertically polarized excitation, there is, therefore, considerable  
 353 polarization anisotropy (0.155) of the emission from the membrane bound label that is reduced to  
 354 near 0 (0.007) for emission from the solution (after membrane rupture). This result is compatible with  
 355 a relatively strong interaction between the fluorophore and the membrane. However, because of the  
 356 flexibility of the linker between the peptide and the fluorophore (see Fig. S13), we suspect that the

357 limited mobility of the fluorophore is due to direct interaction between the lipid's choline and the  
358 fluorophore's sulfite groups rather than mediated by the peptide.

359 The experiment shown in Fig. 5 also clearly illustrates the fact that at the concentrations necessary to  
360 observe ion channel formation, photon counts are too high to permit single molecule measurements  
361 such as fluorescence correlation spectroscopy. Similar results were obtained in an early study on  
362 fluorescently labelled alamethicin, where only a very small fraction of membrane-associated peptides  
363 appear to be involved in channel formation.<sup>27</sup> It should be noted, however, that this problem is unique  
364 to peptides forming multimeric pores by voltage-dependent reorientation (e.g. alamethicin, CtxA,  
365 mellitin) and does not arise with classical ion channels or pores that insert by voltage-independent  
366 mechanisms. In order to circumvent it, one-sided fluorescence quenching similar to the approach  
367 taken in Ref. 28 might be envisaged.

#### 368 **4 Conclusion**

369 We have shown fluorescence characterization of free-standing horizontal lipid membranes under  
370 voltage clamp by epifluorescence wide-field, as well as time-resolved confocal microscopy with  
371 simultaneous electrophysiological measurements using a novel, optically and electrically addressable  
372 micro-electrode-cavity-array (MECA-opto). The optical quality of the experimental apparatus  
373 introduced here allow confocal fluorescence lifetime imaging, determination of fluorescence lifetimes  
374 as well as fluorescence anisotropy from single-photon counting. Wide-field fluorescent microscopy is  
375 somewhat disturbed by the autofluorescence of the borosilicate glass bottom, which may be reduced  
376 by using quartz glass as a low-autofluorescence substrate.<sup>38</sup> In addition, in contrast to e.g. droplet-on  
377 hydrogel systems, membrane diameter is controlled through aperture size, and can easily be reduced  
378 to enhance the bandwidth of electrical recording by reducing bilayer capacitance. However it should  
379 be noted that smaller bilayers also reduce the efficiency of ion channel reconstitution, a step that is  
380 going to be crucial if simultaneous optical electrical measurements on single protein channels will be  
381 attempted. In summary, this device has the potential to greatly simplify simultaneous optical and  
382 electrical recordings from ion channels, pore forming peptides and biological nanopores in membranes  
383 and to realize a long-standing ambition to correlate structural and functional dynamics of single  
384 membrane proteins on the single molecule level.

385

#### 386 **Acknowledgements**

387 TE was partly funded by a PhD fellowship in the framework of the International Graduate College 1642  
388 "Soft Matter Science: Concepts for the Design of Functional Materials" of the Deutsche  
389 Forschungsgemeinschaft (DFG). Work in JCB's laboratory was funded by the German Ministry for

390 Research and Education through Project Management PTJ (TseNareo), by the BW Foundation through  
391 Project Management VDI (MSDS-BioMem) and by the Ministry of Commerce of the State of Baden-  
392 Württemberg in the Framework of the Forum Gesundheitsstandort Baden-Württemberg  
393 (TechPatNano). Acquisition of the Microtime 200 was co-funded by a Major Research Instrumentation  
394 Grant from the DFG (project No. 290424854) and by the BW-foundation (project BITS). We thank Dr.  
395 Gerhard Baaken, Dr. Sönke Petersen and Dr. Ekaterina Zaitseva of Ionera Technologies GmbH for  
396 manufacturing the chip structures and for helpful suggestions, and Prof. Michael Mayer, Fribourg (CH)  
397 for the kind gift of native CtxA.

398 **Author contributions:** J.C.B. conceived the device and its basic design modifications. T.E. and J.C.B.  
399 conceived and designed experimental work, performed experiments, analyzed experimental data,  
400 prepared figures and wrote the manuscript.

401 **Competing interests:** J.C.B. is co-founder and shareholder of Nanion Technologies GmbH, Munich,  
402 Germany and Ionera Technologies GmbH, Freiburg, Germany

403 **Correspondence and requests** for materials should be addressed to J.C.B.

404

#### 405 **References**

- 406 1 R. Blunck, H. McGuire, H. C. Hyde and F. Bezanilla, *Proc. Natl. Acad. Sci. U S A*, 2008, **105**,  
407 20263–20268.
- 408 2 E. E. Weatherill and M. I. Wallace, *Journal of Molecular Biology*, 2015, **427**, 146–157.
- 409 3 A. G. MacDonald and P. C. Wraight, *Prog Biophys Mol Bio*, 1995, **63**, 1–29.
- 410 4 R. Blunck, D. M. Starace, A. M. Correa and F. Bezanilla, *Biophys. J.*, 2004, **86**, 3966–3980.
- 411 5 V. Borisenko, T. Loughheed, J. Hesse, E. Fureder-Kitzmuller, N. Fertig, J. C. Behrends, G. A.  
412 Woolley and G. J. Schutz, *Biophys. J.*, 2003, **84**, 612–622.
- 413 6 G. S. Harms, G. Orr, M. Montal, B. D. Thrall, S. D. Colson and H. P. Lu, *Biophys. J.*, 2003, **85**,  
414 1826–1838.
- 415 7 A. Honigmann, C. Walter, F. Erdmann, C. Eggeling and R. Wagner, *Biophys. J.*, 2010, **98**, 2886–  
416 2894.
- 417 8 P. Bartsch, C. Walter, P. Selenschik, A. Honigmann and R. Wagner, *Materials*, 2012, **5**, 2705–  
418 2730.
- 419 9 H. Suzuki, K. V. Tabata, H. Noji and S. Takeuchi, *Langmuir*, 2006, **22**, 1937–1942.
- 420 10 R. Kawano, T. Osaki, H. Sasaki and S. Takeuchi, *Small*, 2010, **6**, 2100–2104.
- 421 11 V. C. Stimberg, J. G. Bomer, I. van Uiter, A. van den Berg and S. Le Gac, *Small*, 2012, **9**, 1076–  
422 1085.
- 423 12 S. Leptihn, O. K. Castell, B. Cronin, E.-H. Lee, L. C. M. Gross, D. P. Marshall, J. R. Thompson, M.  
424 Holden and M. I. Wallace, *Nat Protoc*, 2013, **8**, 1048–1057.
- 425 13 G. Baaken, M. Sondermann, C. Schlemmer, J. Rühle and J. C. Behrends, *Lab Chip*, 2008, **8**, 938–  
426 944.
- 427 14 J. M. del Rio Martinez, E. Zaitseva, S. Petersen, G. Baaken and J. C. Behrends, *Small*, 2015, **11**,  
428 119–125.

429 15 E. Zaitseva, A. Obergrussberger, C. Weichbrodt, M. Boukhet, F. Bernhard, C. Hein, G. Baaken, N.  
430 Fertig and J. C. Behrends, in *Patch Clamp Electrophysiology: Methods and Protocols*, eds. M.  
431 Dallas and D. Bell, Springer US, New York, NY, 2021, pp. 67–92.

432 16 F. Piguet, T. Ensslen, M. A. Bakshloo, M. Talarimoghari, H. Ouldali, G. Baaken, E. Zaitseva, M.  
433 Pastoriza-Gallego, J. C. Behrends and A. Oukhaled, *Methods Enzymol.*, 2021, **649**, 587–634.

434 17 T. Tonooka, T. Osaki, K. Sato, R. K. S. A. A. , *Sensors and Actuators B: Chemical*, **334**, 129643.  
435 18 P. Mueller, D. O. Rudin, H. Ti Tien and W. C. Wescott, *Nature*, 1962, **194**, 979–980.

436 19 R. Benz and K. Janko, *Biochimica et Biophysica Acta (BBA) - Biomembranes*, 1976, **455**, 721–738.  
437 20 M. Montal and P. Mueller, *Proc. Natl. Acad. Sci. U S A*, 1972, **69**, 3561–3566.

438 21 W. D. Niles, R. A. Levis and F. S. Cohen, *Biophys. J.*, 1988, **53**, 327–335.  
439 22 R. Reiter, E. Zaitseva, G. Baaken, I. Halimeh, J. C. Behrends and A. Zumbuehl, *Langmuir*, 2019,  
440 **35**, 14959–14966.

441 23 W. Hanke, C. Methfessel, H. U. Wilmsen, E. Katz, G. Jung and G. Boheim, *Biochim. Biophys. Acta*,  
442 1983, **727**, 108–114.

443 24 G. Boheim, *J. Membr. Biol.*, 1974, **19**, 277–303.  
444 25 M. Eisenberg, J. E. Hall and C. A. Mead, *J. Membr. Biol.*, 1973, **14**, 143–176.

445 26 L. G. Gordon and D. A. Haydon, *Biochim. Biophys. Acta*, 1972, **255**, 1014–1018.  
446 27 O. Helluin, J. Y. Dugast, G. Molle, A. R. Mackie, S. Ladha and H. Duclouhier, *Biochimica et*  
447 *Biophysica Acta (BBA) - Biomembranes* , 1997, **1330**, 284–292.

448 28 B. Chanda, O. Kwame Asamoah, R. Blunck, B. Roux and F. Bezanilla, *Nature*, 2005, **436**, 852–  
449 856.

450 29 S. F. Mayer, J. Ducrey, J. Dupasquier, L. Haeni, B. Rothen-Rutishauser, J. Yang, A. Fennouri and  
451 M. Mayer, *Bba-Biomembranes*, 2019, **1861**, 183023.

452 30 Y. Bessin, N. Saint, L. Marri, D. Marchini and G. Molle, *Biochim. Biophys. Acta*, 2004, **1667**, 148–  
453 156.

454 31 N. Saint, L. Marri, D. Marchini and G. Molle, *Peptides*, 2003, **24**, 1779–1784.  
455 32 J.-H. Pai, Y. Wang, G. T. Salazar, C. E. Sims, M. Bachman, G. P. Li and N. L. Allbritton, *Anal.*  
456 *Chem.*, 2007, **79**, 8774–8780.

457 33 E. L. Chandler, A. L. Smith, L. M. Burden, J. J. Kasianowicz and D. L. Burden, *Langmuir*, 2004, **20**,  
458 898–905.

459 34 J. Steinkühler, P. De Tillieux, R. L. Knorr, R. Lipowsky and R. Dimova, *Sci. Rep.*, 2018, **8**, 11838–9.  
460 35 S. H. White, in *Ion Channel Reconstitution*, ed. C. Miller, Plenum, New York, 1st edn. 1986, pp.  
461 1–33.

462 36 H. Brismar, O. Trepte and B. Ulfhake, *Journal of Histochemistry & Cytochemistry*, 1995, **43**, 699–  
463 707.

464 37 F. J. Sigworth and K. G. Klemic, *IEEE Trans. NanoBiosci.*, 2005, **4**, 121–127.  
465 38 L. M. Davis, B. K. Canfield, X. Li, W. H. Hofmeister, G. Shen, I. P. Lescano-Mendoza, B. W. Bomar,  
466 J. P. Wikswo, D. A. Markov, P. C. Samson, C. Daniel, Z. Sikorski and W. N. Robinson, in  
467 *Biosensing*, SPIE, 2008, vol. 7035, pp. 56–67.  
468

469

470



471

## Supporting Information (SI)

472

– Figs. SI 1-3 –

473

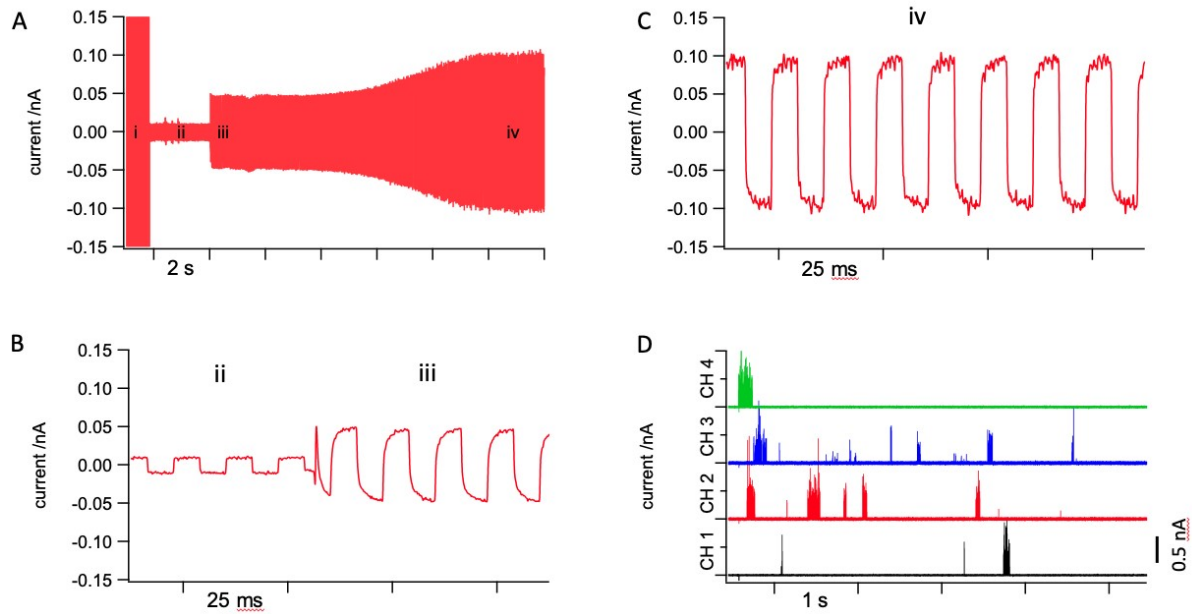

474

475 **Fig. SI 1, A-C:** dynamics of bilayer membrane formation using the bubble method. **A:** Current vs. time  
476 signal monitored from one electrode while a sawtooth voltage pattern was applied to the active  
477 electrode as shown in main text Fig. 1A, but at +/-25 mV and  $dV/dt=2$  V/s. Stages *i-iv* are indicated on  
478 the trace. At *i*, the cavity is open and resistive currents saturate the amplifier; at *ii* the bubble is in  
479 contact with the aperture, at *iii* it is removed and at *iv* the membrane thinning is completed. **B, C:**  
480 Transition from stage *ii* to *iii* and stage *iv* at higher time resolution. **D:** Parallel recording of CtxA-  
481 activity from the 4 channels of the MECA-opto.

482

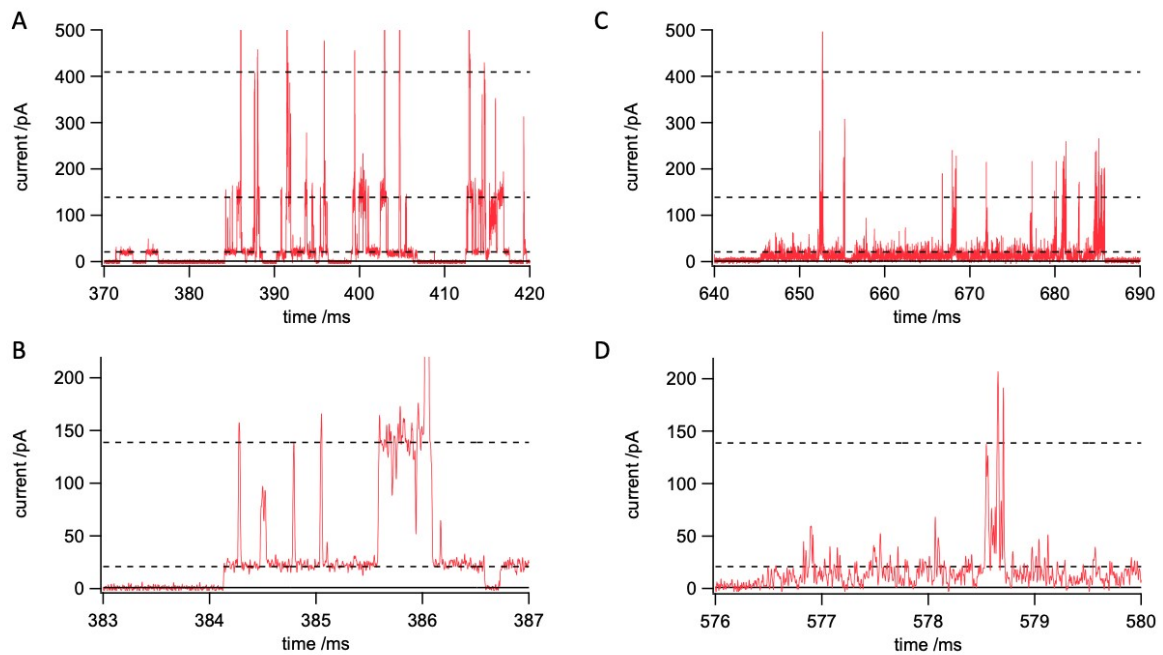

483

484 **Fig. SI 2:** Comparison of pore formation by native CtxA (A, B) and CtxA-C-Atto532M using high-  
 485 bandwidth recordings on the MECA16 chip (Ionera Technologies) chip under conditions of optimized  
 486 resolution (4 M KCl, pH 7.5). Briefly, one of 16 coplanar gold lines leading to MECA16-cavities (50  $\mu\text{m}$   
 487 diam.) was directly contacted with a 1 cm unshielded silver wire to the head-stage of an Axopatch 200B  
 488 (Molecular Devices, Sunnyvale, CA, USA) patch clamp amplifier operated in capacitive feedback mode  
 489 at 50 mV/pA gain with the internal low-pass-filter set to 100 kHz cut-off (-3 dB). The output signal was  
 490 passed through an external low-pass Bessel filter (npi electronic, Tamm, Germany, 8 pole, custom  
 491 version of LHBF-48X-8HL) set to 50 kHz cut-off frequency and digitized at 1 MHz sampling rate using a  
 492 PCI-6251 16 bit ADC interface (National Instruments, Austin, TX, USA) controlled by GePulse software  
 493 (Michael Pusch, University of Genoa, Italy). **A, B:** 50 and 4 ms long current vs. time traces, respectively,  
 494 of native CtxA activity. **C, D:** As in A, B for CtxA-C-Atto532M-mediated activity. Note the different  
 495 current axes for A, C and B, D. Unlike with the less resolved recordings shown in main text Fig. 4E, F, it  
 496 can be appreciated here that current levels for CtxA-C-Atto532M are extremely noisy, as if interrupted  
 497 by rapid blocks.

498

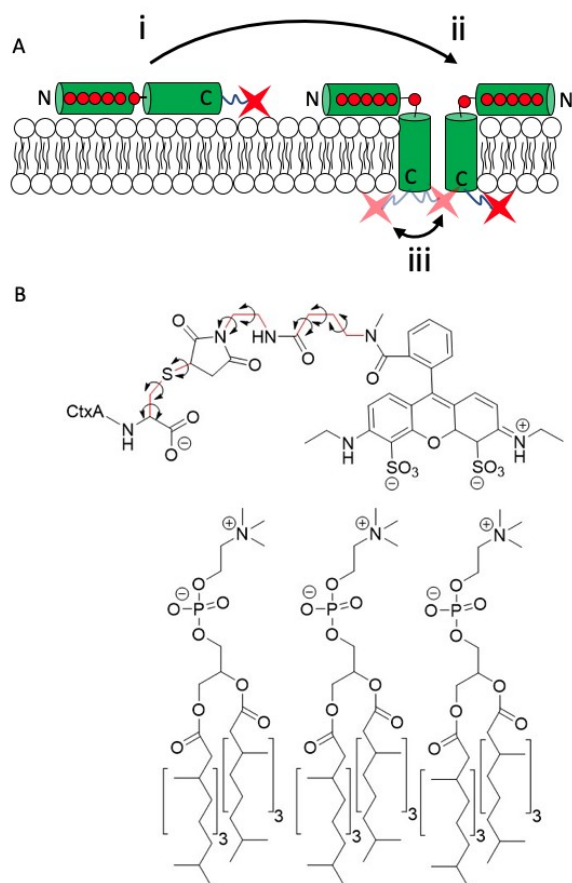

499

500 **Fig. SI 3:** A: Schematic of CtxA-C-Atto532M adsorbed at the lipid bilayer (i) and pore formation by  
 501 inward rotation of the C-terminal helix into the membrane (ii) . In this situation, the highly mobile C-  
 502 terminal maleimide-Atto532 group may be envisaged to induce transient pore blocks as shown at (iii).  
 503 B: Molecular structure of the modified C-terminus of CtxA-C-Atto532M in the labelled form used here  
 504 and the possible interaction of the fluorophore possible with the lipid head groups. Freely rotatable  
 505  $sp^3$ -bonds are shown in red with curved double arrows.

506

507

508

509

510

511
